# Supplementary material for: Polyphenols and IUGR Pregnancies: Effects of the Antioxidant Hydroxytyrosol on Brain Neurochemistry and Development in a Porcine Model
Source: MDPI journal article supplement (doi:10.3390/antiox10060884), 2021-05-31
Supplement: s1 [file s1]

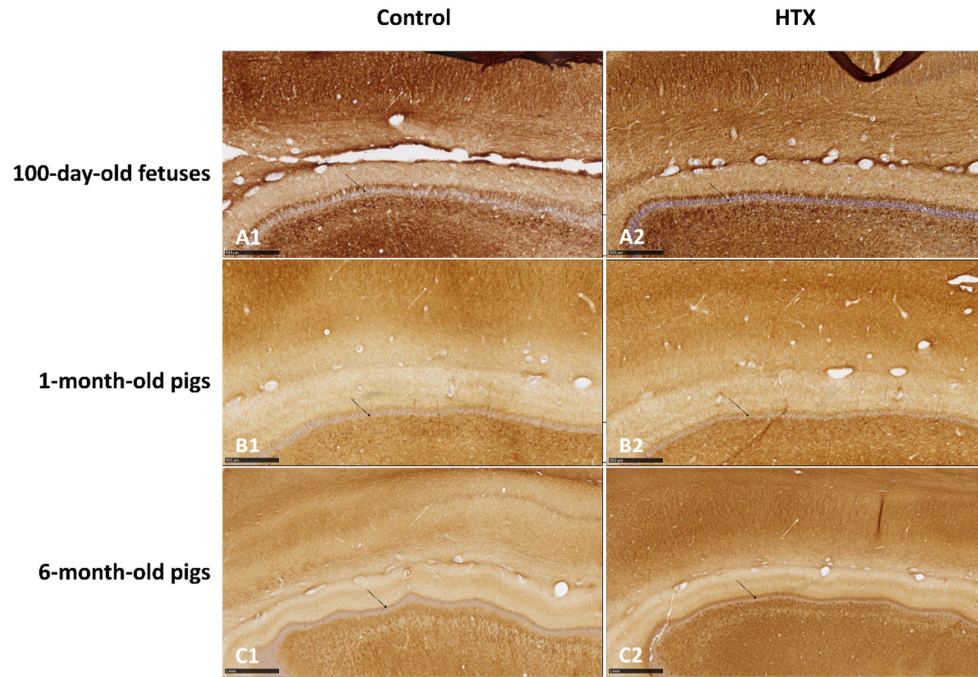

**Figure S1.** Effect of maternal supplementation with HTX on NFT immunostaining in the hippocampi of fetuses at 100 days of gestation (**A1, A2**), 1-month-old pigs (**B1, B2**), and 6-months-old pigs (**C1, C2**). The CA1 is indicated with a white arrow and the GD is shown with a black arrow. Scale bar: 500  $\mu$ m (**A1,2** and **B1,2**), and 1 mm (**C1,2**).
